# Supplementary material
Source: MDPI journal article supplement (https://www.mdpi.com/2571-8789/7/2/52)
Supplement: s1 [file s1]

## Supplementary

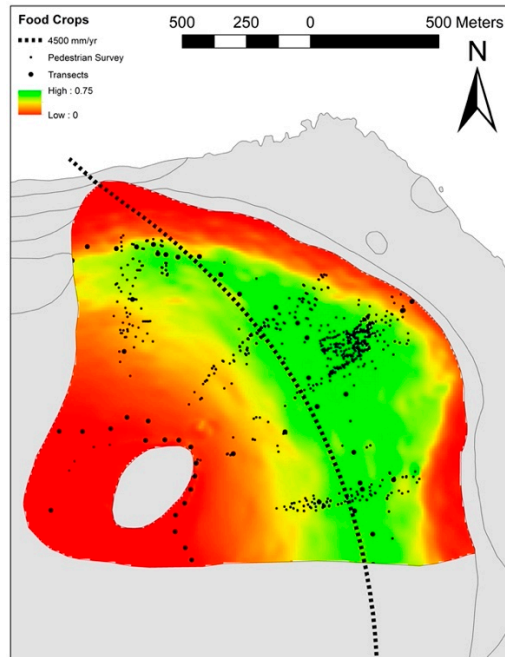

**Figure S1.** Maximum entropy model of food crops identified in the botanical survey.

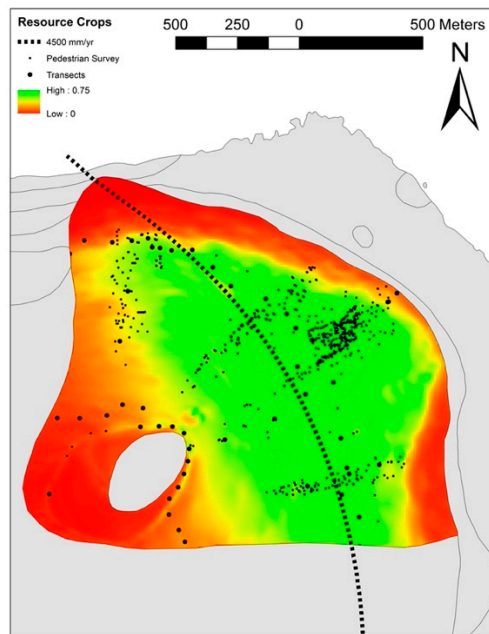

**Figure S2.** Maximum entropy model of resource crops identified in the botanical survey.

Table S1. All Soil Data

| ID     | Lat        | Long       | %C from LOI | pH   | PO4-P      | Ex Ca [cmol]/ Ex K [cmol]/ Ex Mg [cmol]/ Ex Na [cmol]/ CEC | BS (%) | Al   | Mn   | S    | B     | Nb      | Na    | Mg       | Fe  | K     | P     | Cs      |         |       |        |        |
|--------|------------|------------|-------------|------|------------|------------------------------------------------------------|--------|------|------|------|-------|---------|-------|----------|-----|-------|-------|---------|---------|-------|--------|--------|
| 5001a  | -14.233503 | -169.4507  |             | 5.34 |            |                                                            |        |      |      |      |       |         |       |          |     |       |       |         |         |       |        |        |
| 5001b  | -14.233503 | -169.4507  |             | 4.82 |            |                                                            |        |      |      |      |       |         |       |          |     |       |       |         |         |       |        |        |
| 5001c  | -14.233503 | -169.4507  |             |      |            |                                                            |        |      |      |      |       |         |       |          |     |       |       |         |         |       |        |        |
| 5002a  | -14.23236  | -169.44832 |             | 4.91 | 3.7890588  | 0.33                                                       | 0.03   | 0.35 | 0.05 | 8.2  | 9.34  | 41560.9 | 704.8 | 950.4    |     | 31.45 | 12.1  | 3242.9  | 65633.8 | 230.9 | 217.6  |        |
| 5002b  | -14.23236  | -169.44832 |             | 5.34 |            |                                                            |        |      |      |      |       |         |       |          |     |       |       |         |         |       |        |        |
| 5002c  | -14.23236  | -169.44832 |             | 5.54 |            |                                                            |        |      |      |      |       |         |       |          |     |       |       |         |         |       |        |        |
| 5003a  | -14.231465 | -169.44668 |             | 4.91 |            |                                                            |        |      |      |      |       |         |       |          |     |       |       |         |         |       |        |        |
| 5003b  | -14.231465 | -169.44668 |             | 5.1  |            |                                                            |        |      |      |      |       |         |       |          |     |       |       |         |         |       |        |        |
| 5003c  | -14.231465 | -169.44668 |             | 5.05 |            |                                                            |        |      |      |      |       |         |       |          |     |       |       |         |         |       |        |        |
| 5004a  | -14.230691 | -169.4458  |             | 5.45 |            |                                                            |        |      |      |      |       |         |       |          |     |       |       |         |         |       |        |        |
| 5004b  | -14.230691 | -169.4458  |             | 5.4  |            |                                                            |        |      |      |      |       |         |       |          |     |       |       |         |         |       |        |        |
| 5004c  | -14.230691 | -169.4458  |             | 5.02 |            |                                                            |        |      |      |      |       |         |       |          |     |       |       |         |         |       |        |        |
| 5005a  | -14.229768 | -169.44409 |             | 5.01 |            |                                                            |        |      |      |      |       |         |       |          |     |       |       |         |         |       |        |        |
| 5005b  | -14.229768 | -169.44409 |             | 4.71 |            |                                                            |        |      |      |      |       |         |       |          |     |       |       |         |         |       |        |        |
| 5005c  | -14.229768 | -169.44409 |             | 5.07 |            |                                                            |        |      |      |      |       |         |       |          |     |       |       |         |         |       |        |        |
| 5006a  | -14.229013 | -169.4425  |             | 5.58 | 10.6327183 | 1.16                                                       | 0.03   | 0.68 | 0.1  | 12   | 16.32 | 36922.8 | 848.2 | 809.9    |     | 30.65 | 33.0  | 5694.1  | 53941.5 | 364.8 | 617.7  |        |
| 5006b  | -14.229013 | -169.4425  |             | 5.3  |            |                                                            |        |      |      |      |       |         |       |          |     |       |       |         |         |       |        |        |
| 5006c  | -14.229013 | -169.4425  |             | 5.3  |            |                                                            |        |      |      |      |       |         |       |          |     |       |       |         |         |       |        |        |
| 5007a  | -14.228312 | -169.4413  |             | 4.7  |            |                                                            |        |      |      |      |       |         |       |          |     |       |       |         |         |       |        |        |
| 5007b  | -14.228312 | -169.4413  |             | 5.15 |            |                                                            |        |      |      |      |       |         |       |          |     |       |       |         |         |       |        |        |
| 5007c  | -14.228312 | -169.4413  |             | 4.87 |            |                                                            |        |      |      |      |       |         |       |          |     |       |       |         |         |       |        |        |
| 5008a  | -14.227825 | -169.44007 |             | 5.1  |            |                                                            |        |      |      |      |       |         |       |          |     |       |       |         |         |       |        |        |
| 5008b  | -14.227825 | -169.44007 |             | 4.93 |            |                                                            |        |      |      |      |       |         |       |          |     |       |       |         |         |       |        |        |
| 5008c  | -14.227825 | -169.44007 |             | 5.09 |            |                                                            |        |      |      |      |       |         |       |          |     |       |       |         |         |       |        |        |
| 5009a  | -14.227147 | -169.43909 |             | 5.01 |            |                                                            |        |      |      |      |       |         |       |          |     |       |       |         |         |       |        |        |
| 5009b  | -14.227147 | -169.43909 |             | 5.28 |            |                                                            |        |      |      |      |       |         |       |          |     |       |       |         |         |       |        |        |
| 5009c  | -14.227147 | -169.43909 |             | 5.09 |            |                                                            |        |      |      |      |       |         |       |          |     |       |       |         |         |       |        |        |
| 5010a  | -14.225694 | -169.438   |             | 5.32 | 17.5724656 | 1.28                                                       | 0.05   | 1.66 | 0.07 | 14.1 | 21.7  | 34275.3 | 960.8 | 723.7    | 0.8 | 29.65 | 38.6  | 10052.3 | 44191.4 | 471.4 | 834.6  |        |
| 5010b  | -14.225694 | -169.438   |             | 5.31 |            |                                                            |        |      |      |      |       |         |       |          |     |       |       |         |         |       |        |        |
| 5010c  | -14.225694 | -169.438   |             | 5.46 |            |                                                            |        |      |      |      |       |         |       |          |     |       |       |         |         |       |        |        |
| 5011a  | -14.223968 | -169.4368  |             | 5.65 |            |                                                            |        |      |      |      |       |         |       |          |     |       |       |         |         |       |        |        |
| 5011b  | -14.223968 | -169.4368  |             | 5.34 |            |                                                            |        |      |      |      |       |         |       |          |     |       |       |         |         |       |        |        |
| 5011c  | -14.223968 | -169.4368  |             | 6.24 |            |                                                            |        |      |      |      |       |         |       |          |     |       |       |         |         |       |        |        |
| 5012a  | -14.223337 | -169.43573 |             | 5.79 |            |                                                            |        |      |      |      |       |         |       |          |     |       |       |         |         |       |        |        |
| 5012b  | -14.223337 | -169.43573 |             | 5.76 |            |                                                            |        |      |      |      |       |         |       |          |     |       |       |         |         |       |        |        |
| 5012c  | -14.223337 | -169.43573 |             | 6.07 |            |                                                            |        |      |      |      |       |         |       |          |     |       |       |         |         |       |        |        |
| 5013a  | -14.223655 | -169.43143 |             | 5.78 | 14.9707567 | 3.46                                                       | 0.11   | 2.21 | 0.09 | 15.4 | 38.13 | 26305.6 | 590.9 | 917.2    | 2.5 | 0.8   | 90.4  | 6515.5  | 28670.7 | 17.5  | 532.5  | 2417.5 |
| 5013b  | -14.223655 | -169.43143 |             | 5.15 |            |                                                            |        |      |      |      |       |         |       |          |     |       |       |         |         |       |        |        |
| 5013c  | -14.223655 | -169.43143 |             | 5.49 |            |                                                            |        |      |      |      |       |         |       |          |     |       |       |         |         |       |        |        |
| 50137a | -14.223655 | -169.43143 |             | 5.5  | 45.0371567 | 4.83                                                       | 0.13   | 2.62 | 0.1  | 19.7 | 38.98 | 24637.1 | 681.3 | 952.8    | 2.2 | 0.7   | 93.1  | 7657.9  | 30112.2 | 22.9  | 567.8  | 2794.9 |
| 50137b | -14.223655 | -169.43143 |             | 5.52 |            |                                                            |        |      |      |      |       |         |       |          |     |       |       |         |         |       |        |        |
| 50137c | -14.223655 | -169.43143 |             | 5.61 |            |                                                            |        |      |      |      |       |         |       |          |     |       |       |         |         |       |        |        |
| 50145a | -14.222876 | -169.42957 |             | 5.91 | 52.0243715 | 7.54                                                       | 0.17   | 4.58 | 0.18 | 26.5 | 47.15 | 23584.8 | 585.0 | 901.3    | 3.3 | 1     | 95.7  | 8730.6  | 28462.0 | 40.2  | 587.4  | 3760.4 |
| 50145b | -14.222876 | -169.42957 |             | 5.29 | 52.6224619 |                                                            |        |      |      |      |       |         |       |          |     |       |       |         |         |       |        |        |
| 50145c | -14.222876 | -169.42957 |             | 5.67 |            |                                                            |        |      |      |      |       |         |       |          |     |       |       |         |         |       |        |        |
| 50147a | -14.222876 | -169.42957 |             | 5.76 | 44.805033  | 6.94                                                       | 0.13   | 3.07 | 0.09 | 21.9 | 46.73 | 27551.8 | 678.9 | 861.2    | 4.0 | 1.2   | 67.1  | 10268.6 | 32122.6 | 23.2  | 548.1  | 3253.5 |
| 50147b | -14.222876 | -169.42957 |             | 5.93 |            |                                                            |        |      |      |      |       |         |       |          |     |       |       |         |         |       |        |        |
| 50147c | -14.222876 | -169.42957 |             | 5.99 |            |                                                            |        |      |      |      |       |         |       |          |     |       |       |         |         |       |        |        |
| 50155a | -14.219172 | -169.42841 |             | 5.73 | 42.9296    | 9.36                                                       | 0.1    | 4.65 | 0.12 | 28.5 | 49.92 | 24133.2 | 648.5 | 862.8    | 4.1 | 1     | 76.3  | 10295.6 | 29120.4 |       | 714.6  | 4272.6 |
| 50155b | -14.219172 | -169.42841 |             | 5.75 |            |                                                            |        |      |      |      |       |         |       |          |     |       |       |         |         |       |        |        |
| 50155c | -14.219172 | -169.42841 |             | 6.44 |            |                                                            |        |      |      |      |       |         |       |          |     |       |       |         |         |       |        |        |
| 50157a | -14.219172 | -169.42841 |             | 6.13 | 14.7429127 | 7.3                                                        | 0.08   | 3.53 | 0.11 | 16.4 | 67.39 | 24795.9 | 667.9 | 801.2    | 3.0 | 0.9   | 65.0  | 10666.1 | 29894.4 | 15.0  | 708.1  | 3902.2 |
| 50157b | -14.219172 | -169.42841 |             | 7.5  |            |                                                            |        |      |      |      |       |         |       |          |     |       |       |         |         |       |        |        |
| 50157c | -14.219172 | -169.42841 |             | 6.15 |            |                                                            |        |      |      |      |       |         |       |          |     |       |       |         |         |       |        |        |
| 5016a  | -14.2177   | -169.42471 |             | 6.2  | 80.3434774 | 7.61                                                       | 0.08   | 2.49 | 0.07 | 19.9 | 51.39 | 22498.9 | 510.8 | 642.3    | 2.4 | 0.6   | 154.6 | 11983.4 | 22728.1 |       | 1764.4 | 5188.6 |
| 5016b  | -14.2177   | -169.42471 |             | 6.04 |            |                                                            |        |      |      |      |       |         |       |          |     |       |       |         |         |       |        |        |
| 5016c  | -14.2177   | -169.42471 |             | 6.28 |            |                                                            |        |      |      |      |       |         |       |          |     |       |       |         |         |       |        |        |
| 5017b  | -14.218242 | -169.42502 |             | 6.78 | 84.0459418 | 11.13                                                      | 0.23   | 3.63 | 0.11 | 23.5 | 64.21 | 20364.6 | 551.2 | 184.8    | 5.1 | 1.1   | 266.2 | 12788.9 | 24299.0 | 85.7  | 769.2  | 5984.8 |
| 5017c  | -14.218242 | -169.42502 |             | 6.55 |            |                                                            |        |      |      |      |       |         |       |          |     |       |       |         |         |       |        |        |
| 5018a  | -14.218554 | -169.42533 |             | 6.58 | 49.119361  | 11.29                                                      | 0.29   | 4.87 | 0.15 | 28.1 | 59    | 19756.6 | 493.4 | 773.8    | 5.9 | 1.5   | 118.6 | 11019.3 | 22511.5 | 145.9 | 814.3  | 5584.5 |
| 5018b  | -14.218554 | -169.42533 |             | 6.65 |            |                                                            |        |      |      |      |       |         |       |          |     |       |       |         |         |       |        |        |
| 5018c  | -14.218554 | -169.42533 |             | 5.96 |            |                                                            |        |      |      |      |       |         |       |          |     |       |       |         |         |       |        |        |
| 50187a | -14.218554 | -169.42533 |             | 6.29 | 50.7997102 | 9.06                                                       | 0.15   | 4    | 0.09 | 20.5 | 64.78 | 20624.3 | 522.1 | 726.6    | 3.8 | 2.1   | 96.3  | 11578.1 | 23066.4 | 21.4  | 792.8  | 4532.4 |
| 50187b | -14.218554 | -169.42533 |             | 6.08 |            |                                                            |        |      |      |      |       |         |       |          |     |       |       |         |         |       |        |        |
| 50187c | -14.218554 | -169.42533 |             | 6.48 |            |                                                            |        |      |      |      |       |         |       |          |     |       |       |         |         |       |        |        |
| 50195a | -14.218569 | -169.42536 |             | 6.42 | 41.5720297 | 7.65                                                       | 0.14   | 3.96 | 0.09 | 20.3 | 58.45 | 25339.6 | 610.7 | 820.8    | 3.8 | 2.9   | 80.2  | 12015.1 | 34003.5 | 45.3  | 762.6  | 3869.5 |
| 50195b | -14.218569 | -169.42536 |             | 6.25 |            |                                                            |        |      |      |      |       |         |       |          |     |       |       |         |         |       |        |        |
| 50195c | -14.218569 | -169.42536 |             | 5.7  |            |                                                            |        |      |      |      |       |         |       |          |     |       |       |         |         |       |        |        |
| 50197a | -14.218569 | -169.42536 |             | 6.01 | 41.2872248 | 5.26                                                       | 0.04   | 3.92 | 0.05 | 22   | 42.2  | 28917.4 | 701.3 | 699.1    | 2.1 | 3     | 60.5  | 10797.8 | 39402.7 |       | 619.4  | 2729.6 |
| 50197b | -14.218569 | -169.42536 |             | 6.06 |            |                                                            |        |      |      |      |       |         |       |          |     |       |       |         |         |       |        |        |
| 50197c | -14.218569 | -169.42536 |             | 6.03 |            |                                                            |        |      |      |      |       |         |       |          |     |       |       |         |         |       |        |        |
| 50205a | -14.22096  | -169.42873 |             | 5.96 | 50.4959183 | 8.86                                                       | 0.09   | 3.73 | 0.09 | 21.6 | 59.24 | 23562.7 | 586.0 | 805.4    | 4.0 | 2.3   | 56.7  | 11949.2 | 32118.5 |       | 675.6  | 4539.8 |
| 50205b | -14.22096  | -169.42873 |             | 5.92 | 50.9041387 |                                                            |        |      |      |      |       |         |       |          |     |       |       |         |         |       |        |        |
| 50205c | -14.22096  | -169.42873 |             | 5.76 |            |                                                            |        |      |      |      |       |         |       |          |     |       |       |         |         |       |        |        |
| 50207a | -14.22096  | -169.42873 |             | 5.9  | 48.1889981 | 9.13                                                       | 0.09   | 3.22 | 0.04 | 22.6 | 55.12 | 24274.5 | 580.5 | 807.9    | 3.5 | 3.2   | 59.8  | 11647.2 | 31822.5 |       | 674.5  | 4250.6 |
| 50207b | -14.22096  | -169.42873 |             | 5.92 |            | 9.13                                                       | 0.06   | 3.27 | 0.04 | 22.8 | 54.81 | 24377.0 | 596.9 | 806.1    | 3.5 | 2.8   | 54.8  | 11724.5 | 32147.4 |       | 706.7  | 4229.8 |
| 50207c | -14.22096  | -169.42873 |             | 5.93 |            |                                                            |        |      |      |      |       |         |       |          |     |       |       |         |         |       |        |        |
| 5101   | -14.22319  | -169.4334  |             | 5.62 | 40.3663554 | 0.46                                                       | 0.12   | 0.81 | 0.11 | 13.3 | 11.36 | 24843.6 | 134.4 | 1169.917 | 3.2 | 1.3   | 110.4 | 3870.1  | 41682.0 | 127.0 | 578.2  | 634.9  |
| 5102   | -14.223428 | -169.43296 |             | 5.37 | 36.465536  | 2.05                                                       | 0.13   | 1.55 | 0.12 | 15.7 | 24.48 | 32653.7 | 329.8 | 983.7    | 4.1 | 2.1   | 69.9  | 4932.8  | 55727.8 |       | 608.1  | 1435.9 |
| 5103   | -14.224076 | -169.43276 |             | 5.21 | 32.248057  | 2.78                                                       | 0.01   | 0.61 | 0.17 | 12.3 | 40.98 | 24473.9 | 423.1 | 884.4</  |     |       |       |         |         |       |        |        |
